# Supplementary material for: Constructing Precipitable Water Vapor Map from Regional GNSS Network Observations without Collocated Meteorological Data
Source: Copernicus journal article supplement (doi:10.5194/amt-2018-83), 2018-05-02
Supplement: Supplementary file [file amt-2018-83-RC2-supplement.pdf]

# Constructing Precipitable Water Vapor Map from Regional GNSS Network Observations without Collocated Meteorological Data

Biyan Chen<sup>1,2</sup>, Wujiao Dai<sup>1,2</sup>, Zhizhao Liu<sup>3</sup>, Lixin Wu<sup>1</sup>, Cuilin Kuang<sup>1,2</sup>, Minsi Ao<sup>4</sup>

<sup>1</sup>School of Geosciences and Info-Physics, Central South University, Changsha, Hunan, China

<sup>2</sup>Key Laboratory of Precise Engineering Surveying & Deformation Disaster Monitoring of Hunan Province, Changsha, Hunan, China

<sup>3</sup>Department of Land Surveying and Geo-Informatics, Hong Kong Polytechnic University, Hong Kong, China

<sup>4</sup>Hunan Province Mapping and Science and Technology Investigation Institute, Changsha, Hunan, China

Correspondence to: Biyan Chen (year124@csu.edu.cn); Zhizhao Liu (lszzliu@polyu.edu.hk)

**Abstract.** Surface pressure ( $P_s$ ) and weighted mean temperature ( $T_m$ ) are two necessary variables for the accurate retrieval of precipitable water vapor (PWV) from global navigation satellite system (GNSS) data. The lack of  $P_s$  or  $T_m$  information is a concern for those GNSS sites that are not collocated with meteorological sensors. This paper investigates an alternative method of inferring accurate  $P_s$  and  $T_m$  at the GNSS station using nearby synoptic observations.  $P_s$  and  $T_m$  obtained at the nearby synoptic sites are interpolated onto the location of GNSS station by performing both vertical and horizontal adjustments, in which the parameters involved in  $P_s$  and  $T_m$  calculation are estimated from ERA-Interim reanalysis profiles. In addition, we present a method of constructing high quality PWV maps through vertical reduction and horizontal interpolation of the retrieved GNSS PWVs. To evaluate the performances of the  $P_s$  and  $T_m$  retrieval, and the PWV map construction, GNSS data collected from 58 stations of the Hunan GNSS network and synoptic observations from 20 nearby sites in 2015 were processed to extract the PWV so as to subsequently generate the PWV map. The retrieved  $P_s$  and  $T_m$  and constructed PWV maps were assessed by the results derived from radiosonde and ERA-Interim reanalysis. The results show that (1) accuracies of  $P_s$  and  $T_m$  derived by synoptic interpolation are within the range of 1.7-3.0 hPa and 2.5-3.0 K, respectively, which are much better than the GPT2w model; (2) the constructed PWV maps have good agreements with radiosonde and ERA reanalysis data with overall accuracy better than 3 mm; and (3) PWV maps can well reveal the moisture advection, transportation and convergence during heavy rainfall.

## 1 Introduction

Water vapor is an important meteorological parameter, which plays a crucial role in the formation of various weather phenomenon such as cloud, rain and snow (Ahrens and Samson, 2011). Water vapor accounts for only 0.1-3% of the total atmosphere, however due to the latent heat release, a small amount of water vapor may cause severe weather changes (Mohanakumar, 2008). The monitoring of atmospheric water vapor variation is thus of significant value for short-term severe weather forecasting (Brenot et al., 2013; Labbouz et al., 2013; Van Baelen et al., 2011; Zhang et al., 2015). Among



the various atmosphere sensing techniques, GNSS (Global Navigation Satellite System) is regarded as a uniquely powerful means to estimating the water vapor with advantages of all-weather capability, high accuracy, and low-operating expense (Bevis et al., 1992; Yao et al., 2017). *I add Guerova et al (2016)*

While GNSS signals <sup>are</sup> transmit from satellites to ground receivers, they are delayed by the terrestrial troposphere. In GNSS data processing, the tropospheric delay is usually expressed as the zenith tropospheric delay (ZTD) multiplied by a mapping function, and sometimes plus horizontal gradients for a better performance (Lu et al., 2016). At present, ZTDs are likely to be determined with accuracies up to several millimeters by a wide range of GNSS processing software ~~programs~~ (Yuan et al., 2014). ZTD is normally divided into two parts: <sup>the</sup> zenith hydrostatic delay (ZHD) <sup>which is</sup> caused by the dry gases of the troposphere and <sup>the</sup> zenith wet delay (ZWD) <sup>which stems from</sup> by the water vapor. The ZHD can be accurately calculated using empirical models with surface pressure ( $P_s$ ) measured by meteorological sensors (Saastamoinen, 1972). ZWD is readily obtained with the subtraction of ZHD from ZTD. The precipitable water vapor (PWV) can then be retrieved from ZWD with a conversion factor which is a function of the weighted mean temperature ( $T_m$ ).  $T_m$  can be calculated by numerical integration from the vertical profiles of atmospheric temperature and humidity (Davis et al., 1985). PWV is a key parameter in studying water vapor variations during severe weather phenomena, since it can reflect the inflow and outflow of water vapor in a vertical air column above a certain area (Yao et al., 2017).

As stated above, the retrieval of PWV from GNSS-ZTD needs two key meteorological parameters  $P_s$  and  $T_m$ . The first choice is to measure the  $P_s$  by barometer collocated at the GNSS station. However, a large number of GNSS stations have been deployed for positioning purposes and not equipped with collocated meteorological sensors. In this case, one may use pressure derived from a global atmospheric reanalysis (Dee et al., 2011; Zhang et al., 2017) or interpolated from nearby meteorological observations (Alshawaf et al., 2015; Musa et al., 2011; Wang et al., 2007) or predicted by a blind model (Böhm et al., 2015; Wang et al., 2017). For  $T_m$ , since the temperature and humidity profiles are very difficult to obtain, particularly in a near-real-time mode,  $T_m$  has to be calculated from a model. An empirical  $T_m$  model dependent on surface temperature ( $T_s$ ) (Bevis et al., 1994) or a blind model developed from atmospheric reanalysis products (Böhm et al., 2015; Yao et al., 2013; Zhang et al., 2017) <sup>are</sup> ~~is~~ often employed.

The work presented in this paper is carried out for constructing high quality PWV maps by a regional GNSS network in the Hunan Province, China for precipitation forecasts and analysis. The constructed high quality PWV maps will also be of significant values for monitoring and early warning of geological disasters, such as landslides and mud-rock flows. In such a near-real-time application, the use of reanalysis products is not feasible.  $P_s$  and  $T_m$  have to be determined only using a blind model or nearby surface synoptic stations. The use of blind models is a very convenient means, however, most blind models (e.g. Global Pressure and Temperature 2 wet, GPT2w; (Böhm et al., 2015)) are developed at a global scale and <sup>are</sup> not likely to capture regional small-scale variations. More accurate  $P_s$  and  $T_m$  could be achieved by interpolation from nearby meteorological observations if they can be accessed simultaneously. In this study, we investigate the construction of PWV maps from GNSS observations over the Hunan Province by performing the following five tasks: (1)  $T_m - T_s$  relationship and vertical reduction models for  $P_s$  and  $T_m$  are developed for each synoptic station; (2)  $P_s$  and  $T_m$  data interpolated by nearby



meteorological observations are compared with those derived from radiosonde and GPT2w model; (3) PWV vertical reduction model is developed for each GNSS station; (4) PWV interpolation is performed over the whole Hunan region and evaluated by radiosonde and European Centre for Medium Range Weather Forecasts Reanalysis (ECMWF) ERA-Interim reanalysis; and (5) ~~monitors the~~ water vapor variation during a heavy rain event that occurred over a wide range of Hunan is examined based on PWV maps.

This paper is organized as follows. Section 2 presents the study area and the datasets used in the study. Section 3 describes the methodology to retrieve PWV from GNSS data. The strategy for meteorological data interpolation,  $T_m$  modeling and PWV interpolation is also presented in this section. The assessment of  $P_s$  and  $T_m$  interpolated by nearby synoptic observations is described in section 4. The PWV map constructed by GNSS data and PWV evolution during a heavy rain event ~~is~~ <sup>are</sup> also presented in section 4. The summary and conclusions are given in section 5.

## 2 Study area and data description

The Hunan Province is located in the middle reaches of the Yangtze watershed in the South Central China, with a territory of about 211,800 km<sup>2</sup>. Hunan enjoys a subtropical humid monsoon climate bearing obvious features of continental climate. The average annual rainfall varies between 1200-1700 mm, with 50%-60% concentrating in the months from April to August. Heavy showers and thunderstorms frequently occur in summer, causing catastrophic casualties <sup>conditions</sup> as well as significant damages to urban infrastructure and agricultural production. The monitoring of water vapor variations <sup>the</sup> using GNSS network has a great potential to improve the capacity of extreme weather forecasting in the Hunan region.

### 2.1 GNSS, synoptic and radiosonde stations in Hunan

In 2015, 58 GNSS stations were deployed in the Hunan GNSS network and new stations <sup>have subsequently been</sup> continually added (see Figure 1). At present, the GNSS network consists of more than 90 stations and the number is still <sup>in</sup> increase. Most of the GNSS stations are equipped with Trimble or Leica receivers and have a typical sampling interval of 30 s. None of them <sup>are</sup> is however, collocated with meteorological sensors, thus they cannot be directly used for water vapor monitoring. Therefore, a strategy of using nearby synoptic observations is needed to acquire <sup>the</sup> necessary meteorological parameters for GNSS-PWV retrieval. As shown in Figure 1, a total of 20 synoptic sites situated in Hunan and surrounding provinces can be used for this study. The 6-hourly pressure and temperature data measured at the synoptic sites can be retrieved from the National Center for Atmospheric Research (NCAR) (<http://rda.ucar.edu/datasets/ds336.0/>). In addition, atmospheric profiles observed by three radiosonde sites (marked with cyan diamonds in Figure 1) will be used to evaluate the meteorological data and PWV measurements.

\* rephrase to avoid repetition of the word "climate".



improve visibility of legend  
by framing the legend and  
colour the background white.

add a  
legend

or  
identify  
GNSS

synoptic and  
radiosonde

site in  
caption

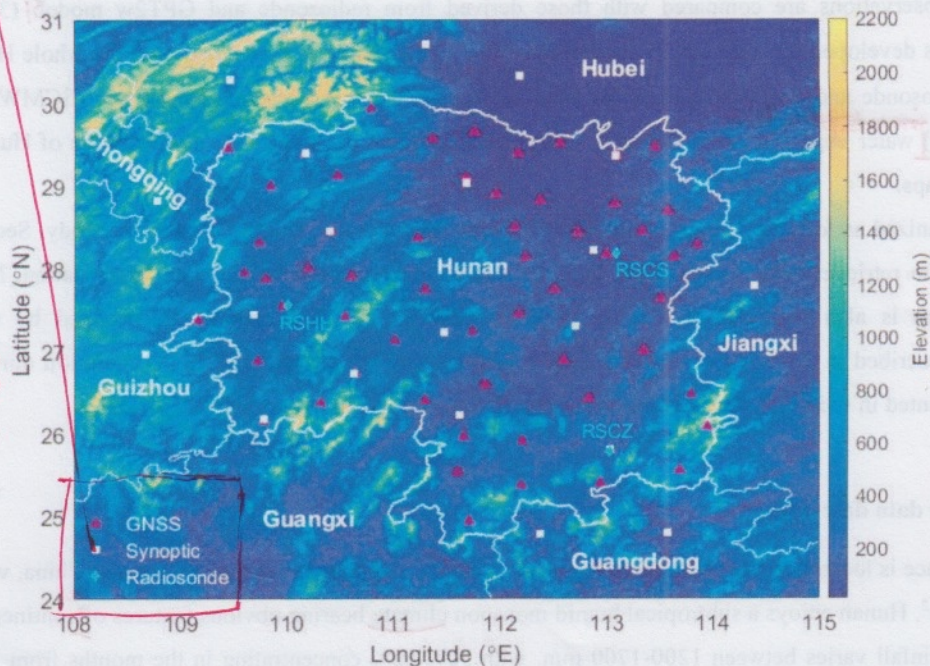

can you change colour scheme?  
This one is good for PUV but not  
topography.

Figure 1: Geographic distribution of GNSS, synoptic and radiosonde stations in Hunan and surrounding provinces.

## 2.2 ECMWF reanalysis

ECMWF ERA-Interim is a global atmospheric reanalysis from 1979, continuously updated in near-real-time. In the reanalysis data generation, meteorological observations from in situ platforms (e.g., surface weather stations, ships, buoys, radiosonde stations, and aircraft) and remote sensing satellites are assimilated into atmospheric physical models to recreate the past atmospheric conditions (Dee et al., 2011). Due to its high quality and global coverage, <sup>the</sup> ERA-Interim reanalysis has been exploited in various fields, e.g. GNSS meteorology (Wang et al., 2017; Zhang et al., 2017) and climate change research (Chen and Liu, 2016b; Lu et al., 2015). <sup>The</sup> ERA-Interim reanalysis provides pressure, temperature, humidity and many other meteorological variables at 37 isobaric levels from 1000 hPa to 1 hPa with a 6 h interval. The reanalysis contains grid products with 11 different scales from  $0.125^\circ \times 0.125^\circ$  to  $3^\circ \times 3^\circ$ , and the horizontal resolution of  $0.25^\circ \times 0.25^\circ$  is selected for this study. *which equates to about 7 km in Hunan.*

## 2.3 GPT2w model

The blind model global pressure and temperature (GPT), which is developed using spherical harmonics (Boehm et al., 2007), can provide pressure and temperature at any site in the vicinity of the Earth's surface. Lagler et al., (2013) significantly improved the GPT model, especially for its spatial and temporal variability, and named this new version as GPT2. An extension version called GPT2w was developed by Böhm et al., (2015) with improved capability to determine



ZWD in blind mode. Besides the pressure and temperature, the refined GPT2w model also provides various parameters such as water vapor pressure, weighted mean temperature and temperature lapse rate.

### 3 PWV map construction with GNSS network observations

#### 3.1 Retrieval of PWV from GNSS-ZTD

- 5 To retrieve PWV from GNSS-inferred ZTD, ZHD should be first determined. The ZHD calculation formula is theoretically derived based on the assumption that the air is an ideal gas and that the troposphere satisfies the hydrostatic equilibrium (Davis *et al.*, 1985). Saastamoinen (1972) derived the most widely used ZHD model as follows (Chen and Liu, 2016b):

$$ZHD = 2.2793 P_s / (1 - 0.0026 \cos 2\varphi - 0.00028h), \quad (1)$$

- where  $\varphi$  is the station latitude (unit: radians) and  $h$  is the height of the station above sea level (unit: km). By subtracting  
10 ZHD from ZTD, the remainder ZWD can then be converted to PWV by using the formula below (Askne and Nordius, 1987):

$$PWV = \frac{10^5}{(k_3/T_m + k'_2)R_v} ZWD, \quad (2)$$

where  $k_3 = 3.776 \times 10^5$  K<sup>2</sup>/hPa,  $k'_2 = 16.52$  K/hPa, and  $R_v = 461.495$  J/K/kg are physical constants. The weighted mean temperature  $T_m$  is defined as (Davis *et al.*, 1985):

$$T_m = \frac{\int \frac{e(h)}{T(h)} dh}{\int \frac{e(h)}{T(h)^2} dh}, \quad (3)$$

- 15 where  $e(h)$  and  $T(h)$  are the water vapor pressure (hPa) and temperature (K) at height  $h$ , respectively. Since the humidity and temperature profiles are usually unavailable, a linear relationship between surface temperature  $T_s$  and  $T_m$  is often adopted to determine the  $T_m$ :

$$T_m = a + bT_s, \quad (4)$$

where  $a$  and  $b$  are coefficients that need to be fitted locally using radiosonde or reanalysis profiles.

#### 20 3.2 Spatial adjustments for $P_s$ and $T_m$

Because no stations in the Hunan GNSS network are equipped with meteorological sensors, a method of spatially adjusting nearby meteorological observations to the GNSS stations is developed. Adjacent synoptic sites within the 100 km radius of a given GNSS station are employed in the adjustments. First, surface pressure and mean weighted temperature data at the synoptic sites are adjusted to the height  $H_s$  of the given GNSS station:

$$25 P_s = P_r e^{\mu(H_s - H_r)}, \quad (5)$$



$$T_m = T_{mr} + \alpha(H_s - H_r), \quad (6)$$

where  $P_r$ ,  $T_{mr}$ , and  $H_r$  are the pressure, weighted mean temperature, and height at the synoptic site, respectively. Here,  $T_{mr}$  is calculated by equation (4) using the surface temperature measured on site.  $P_s$  and  $T_m$  are the pressure and weighted mean temperature corresponding to the height  $H_s$  at the synoptic site.  $\mu$  and  $\alpha$  are parameters need to be estimated at the synoptic site.

Then the vertically adjusted meteorological data are interpolated to the location of the GNSS station according to:

$$y_G = \frac{\sum_{i=1}^n \exp(-d_i^2) \cdot y_i}{\sum_{i=1}^n \exp(-d_i^2)}, \quad (7)$$

where  $n$  is the number of synoptic sites with a distance less than 100 km to the given GNSS site;  $y_G$  is the interpolated value;  $y_i$  is the adjusted meteorological data at synoptic site  $i$ ; and  $d_i$  is the distance between synoptic site  $i$  and the GNSS station.

### 3.3 PWV interpolation from GNSS stations

With the use of interpolated  $P_s$  and  $T_m$ , PWV data at the GNSS stations could be obtained in near-real-time. In order to construct the PWV map, GNSS PWV data are used to interpolate at a  $0.25^\circ \times 0.25^\circ$  grid. Similar to the meteorological data, PWVs at nearby GNSS stations are interpolated to the given height  $H_p$  of the grid point as follows (Dousa and Elias, 2014):

$$PWV = PWV_r \left[ 1 - \frac{\beta(H_s - H_r)}{T_s} \right]^{\frac{\theta \cdot g}{\beta \cdot R_d}}, \quad (8)$$

where  $PWV_r$  is the PWV estimated at the GNSS station;  $\beta$  refers to the temperature lapse rate (unit: K/km);  $\theta$  a numerical coefficient;  $g$  is gravity acceleration (unit:  $m \cdot s^{-2}$ ); and  $R_d = 287.053 J \cdot K^{-1} \cdot kg^{-1}$  is the gas constant for dry air. Both  $\beta$  and  $\theta$  are required to be determined from local observations for a better performance. The PWV at the grid point can then be acquired by interpolation using equation (7). In this study, the height of each grid point is derived from the global topography/bathymetry grid that has a 30-arc second resolution (SRTM30 PLUS) (Becker et al., 2009).

## 4 Results and discussion

### 4.1 Evaluation of $P_s$ and $T_m$ interpolated by synoptic data

All the parameters including  $a$  and  $b$  in equation (4),  $\mu$  in (5), and  $\alpha$  in (6) are estimated locally at each synoptic site using reanalysis products. In this study, the values of  $a$ ,  $b$ ,  $\mu$  and  $\alpha$  for each site are fitted from ECMWF atmospheric profiles over the whole year of 2014. With the use of the estimated parameters, spatial adjustments for  $P_s$  and  $T_m$  to radiosonde stations are performed throughout the year of 2015. Then the interpolated meteorological data are directly compared with the radiosonde observations.



Figure 2 shows the time series of  $P_s$  provided by radiosonde, synoptic interpolation and GPT2w model at three radiosonde stations over 2015. Surface pressures interpolated from synoptic observations have a very good agreement with radiosonde measured ones. The GPT2w model basically reflects the variation trend of  $P_s$  throughout the year, however, it is unable to capture the fluctuations which are especially obvious in winter and spring months. Similar results can be observed in Figure 3 for  $T_m$  comparison. Detailed statistics of the comparison results are given in Table 1. RMS (root mean squares) errors of  $P_s$  and  $T_m$  derived from synoptic interpolation vary in the range of 1.7-3.0 hPa and 2.5-3.0 K, respectively. In comparison, the RMS errors from the GPT2w model are 4.7-5.6 hPa and 3.8-4.2 K, respectively, for  $P_s$  and  $T_m$ , which are much larger than the synoptic interpolation method. In terms of maximum and minimum differences, GPT2w derived values are significantly larger than those derived from synoptic interpolation, further indicating the GPT2w model is less accurate. According to equation (1), 1 hPa error in surface pressure would cause about 2.3 mm error in ZHD. Therefore, 3 hPa error in  $P_s$  will result in an error of about 6.9 mm in ZHD (~1.15 mm in PWV). In addition, the relative error of the PWV caused by the  $T_m$  error is approximately equal to the relative error of the  $T_m$  (Zhang *et al.*, 2017). Derived from Figure 3 and Table 1, the relative error of synoptic data interpolated  $T_m$  is about 1%. In the study region, the PWV value is usually less than 80 mm, meaning the PWV error caused by  $T_m$  error is within 0.8 mm. On the whole, the accuracy of PWV retrieved from GNSS-ZTD using  $P_s$  and  $T_m$  from synoptic interpolation is better than 2 mm. Following the same error analysis, the uncertainty of PWV caused by GPT2w model is about 3.1 mm. It is notable that for weather nowcasting, the accuracy threshold is 3 mm (Yuan *et al.*, 2014). This indicates that the PWVs retrieved from synoptic interpolation are accurate enough for weather nowcasting, while the PWV from GPT2w model fails to meet this requirement.



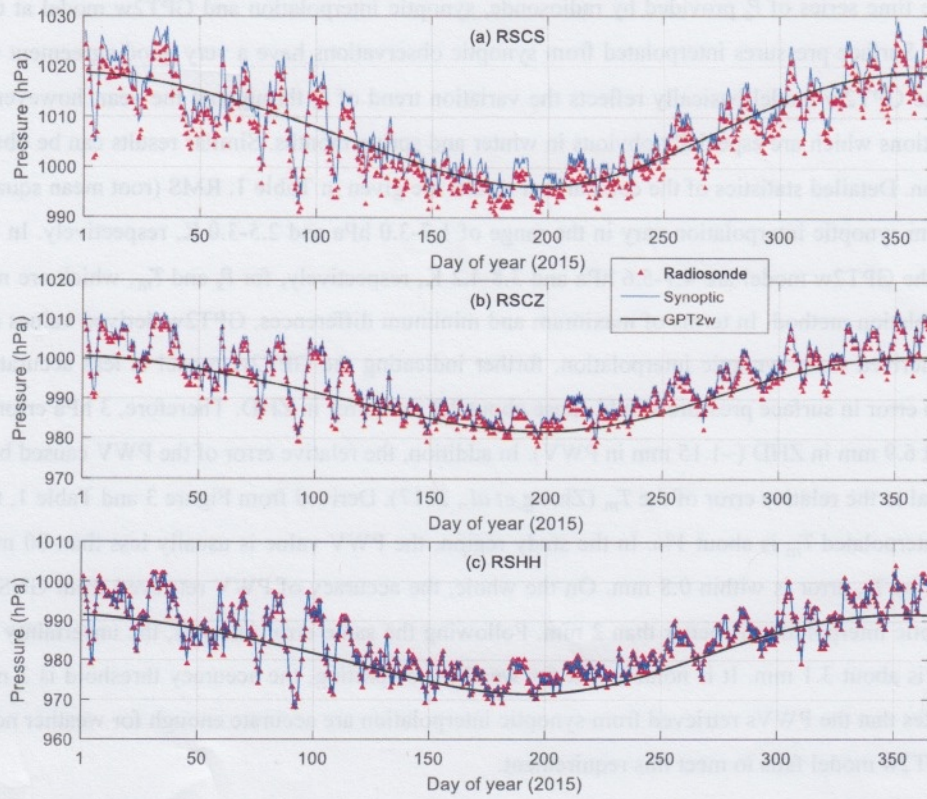

**Figure 2: Time series of surface pressure provided by radiosonde, synoptic adjustment and GPT2w model over the whole year of 2015 at three radiosonde stations: (a) RSCS, (b) RSCZ, and (c) RSHH, all of which are located in the Hunan Province, China.**



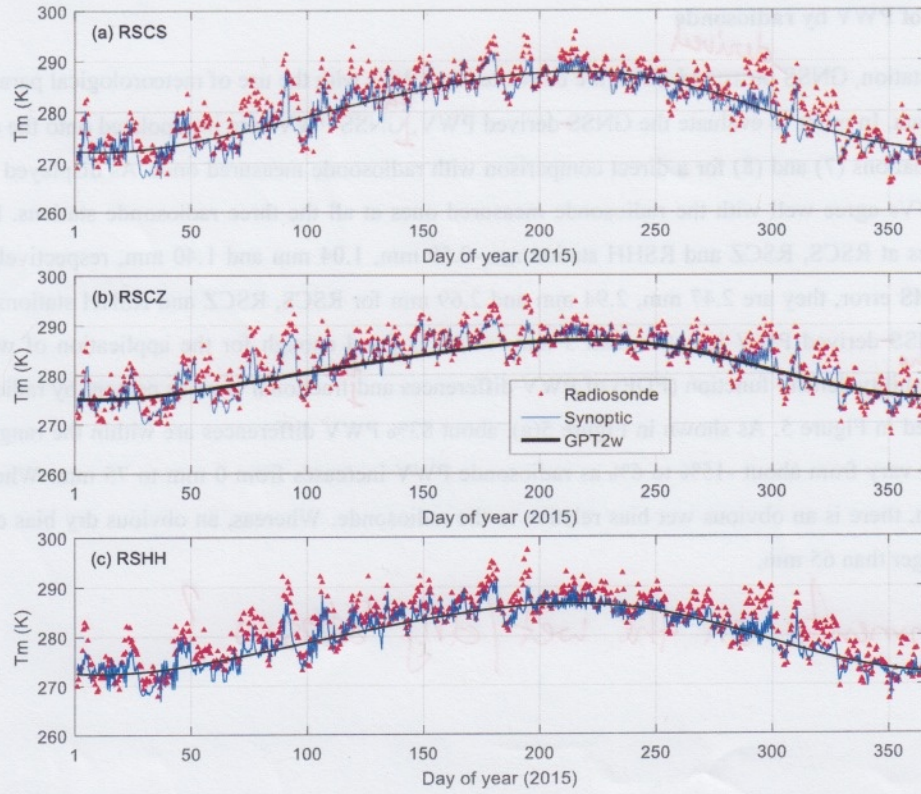

Figure 3: Time series of weighted mean temperature provided by radiosonde, synoptic adjustment and GPT2w model over the whole year of 2015 at three radiosonde stations: (a) RSCS, (b) RSCZ, and (c) RSHH, all of which are located in the Hunan Province, China.

5

Table 1: Comparison of  $P_s$  and  $T_m$  for Radiosonde-Synoptic and Radiosonde-GPT2w at the three radiosonde stations

| Comparison                |      | RSCS     |        | RSCZ     |        | RSHH     |        |
|---------------------------|------|----------|--------|----------|--------|----------|--------|
|                           |      | Ps (hPa) | Tm (K) | Ps (hPa) | Tm (K) | Ps (hPa) | Tm (K) |
| Radiosonde vs<br>Synoptic | Bias | 2.91     | 1.47   | -1.66    | 1.14   | -2.58    | 1.49   |
|                           | RMS  | 2.97     | 2.92   | 1.74     | 2.58   | 2.61     | 2.76   |
|                           | Max  | 5.04     | 9.69   | 0.48     | 7.42   | -1.33    | 9.17   |
|                           | Min  | 1.01     | -6.40  | -3.82    | -5.18  | -3.82    | -5.40  |
| Radiosonde vs<br>GPT2w    | Bias | 1.23     | 1.59   | 2.02     | 1.68   | 3.06     | 2.23   |
|                           | RMS  | 4.70     | 3.84   | 4.76     | 4.02   | 5.56     | 4.16   |
|                           | Max  | 13.75    | 13.29  | 12.26    | 14.21  | 14.96    | 14.48  |
|                           | Min  | -16.13   | -7.44  | -13.46   | -8.08  | -14.94   | -6.34  |



#### 4.2 Evaluation of PWV by radiosonde

At each GNSS station, GNSS <sup>derived</sup> measured ZTDs are converted to PWVs with the use of meteorological parameters interpolated from synoptic data. In order to evaluate the GNSS <sup>the</sup> derived PWV, GNSS PWVs are interpolated onto the radiosonde stations according to equations (7) and (8) for a direct comparison with radiosonde measured ones. As displayed in Figure 4, GNSS interpolated PWVs agree well with the radiosonde measured ones at all the three radiosonde stations. Mean biases of the PWV differences at RSCS, RSCZ and RSHH station are -0.59 mm, 1.04 mm and 1.40 mm, respectively (see Table 2). In terms of the RMS error, they are 2.47 mm, 2.94 mm and 2.69 mm for RSCS, RSCZ and RSHH stations, respectively. The accuracy of GNSS <sup>as the</sup> derived PWV is better than 3 mm, which is good enough for the application of weather nowcasting. Additional probability density function (PDF) of PWV differences and <sup>the</sup> fractional error as percent by radiosonde 5 mm PWV bins are exhibited in Figure 5. As shown in Figure 5(a), about 83% PWV differences are within the range of -5~5 mm. The fractional errors vary from about -15% to 6% as radiosonde PWV increases from 0 mm to 75 mm. When PWV values are less than 10 mm, there is an obvious wet bias relative to the radiosonde. Whereas, an obvious dry bias can be observed for PWV values larger than 65 mm.

any comments on the wet/dry biases?

| Comparison |      | RSCS  |      | RSCZ |      | RSHH |      |
|------------|------|-------|------|------|------|------|------|
| Mean       | Std  | Mean  | Std  | Mean | Std  | Mean | Std  |
| 1.04       | 2.94 | -0.59 | 2.47 | 1.40 | 2.69 | 1.04 | 2.94 |
| 1.04       | 2.94 | -0.59 | 2.47 | 1.40 | 2.69 | 1.04 | 2.94 |
| 1.04       | 2.94 | -0.59 | 2.47 | 1.40 | 2.69 | 1.04 | 2.94 |
| 1.04       | 2.94 | -0.59 | 2.47 | 1.40 | 2.69 | 1.04 | 2.94 |
| 1.04       | 2.94 | -0.59 | 2.47 | 1.40 | 2.69 | 1.04 | 2.94 |
| 1.04       | 2.94 | -0.59 | 2.47 | 1.40 | 2.69 | 1.04 | 2.94 |
| 1.04       | 2.94 | -0.59 | 2.47 | 1.40 | 2.69 | 1.04 | 2.94 |
| 1.04       | 2.94 | -0.59 | 2.47 | 1.40 | 2.69 | 1.04 | 2.94 |
| 1.04       | 2.94 | -0.59 | 2.47 | 1.40 | 2.69 | 1.04 | 2.94 |
| 1.04       | 2.94 | -0.59 | 2.47 | 1.40 | 2.69 | 1.04 | 2.94 |



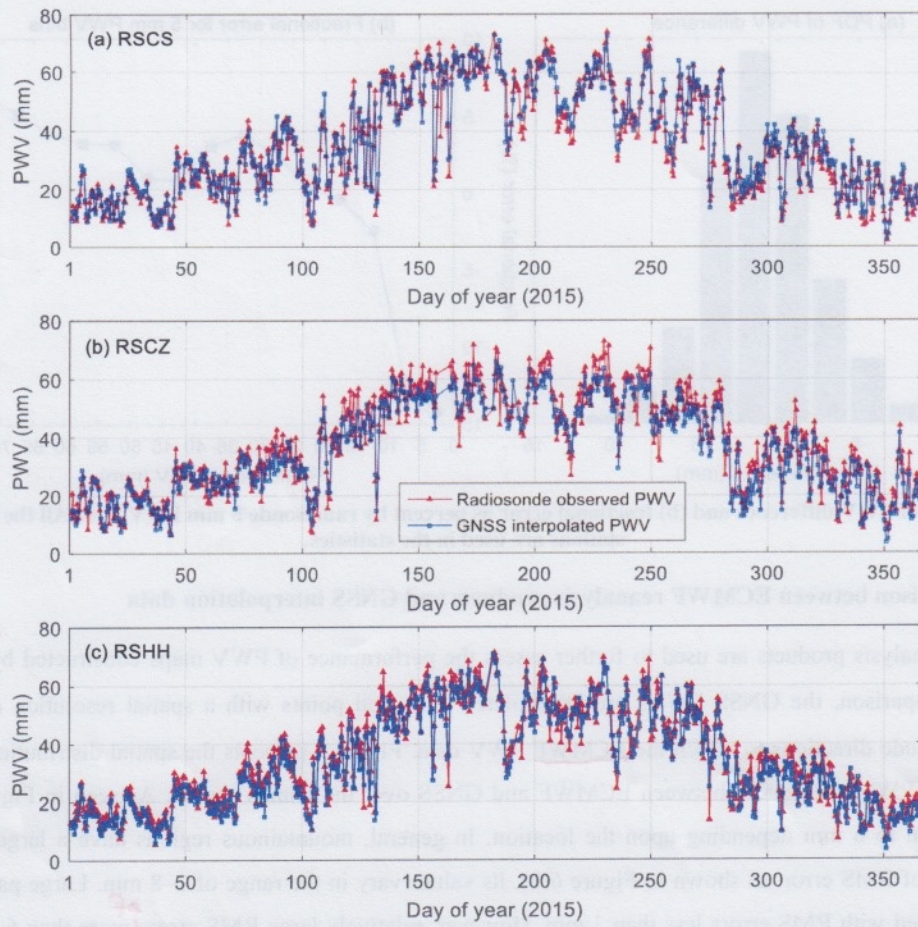

Figure 4: Time series of PWV measured by radiosonde and interpolated by GNSS over the whole year of 2015 at three radiosonde stations: (a) RSCS, (b) RSCZ, and (c) RSHH.

Table 2: Comparison between radiosonde observed and GNSS interpolated PWV at the three radiosonde stations

| Radiosonde station | Bias (mm) | RMS (mm) | Max (mm) | Min (mm) |
|--------------------|-----------|----------|----------|----------|
| RSCS               | -0.59     | 2.47     | 7.46     | -7.96    |
| RSCZ               | 1.04      | 2.94     | 10.44    | -11.15   |
| RSHH               | 1.40      | 2.69     | 9.27     | -8.59    |



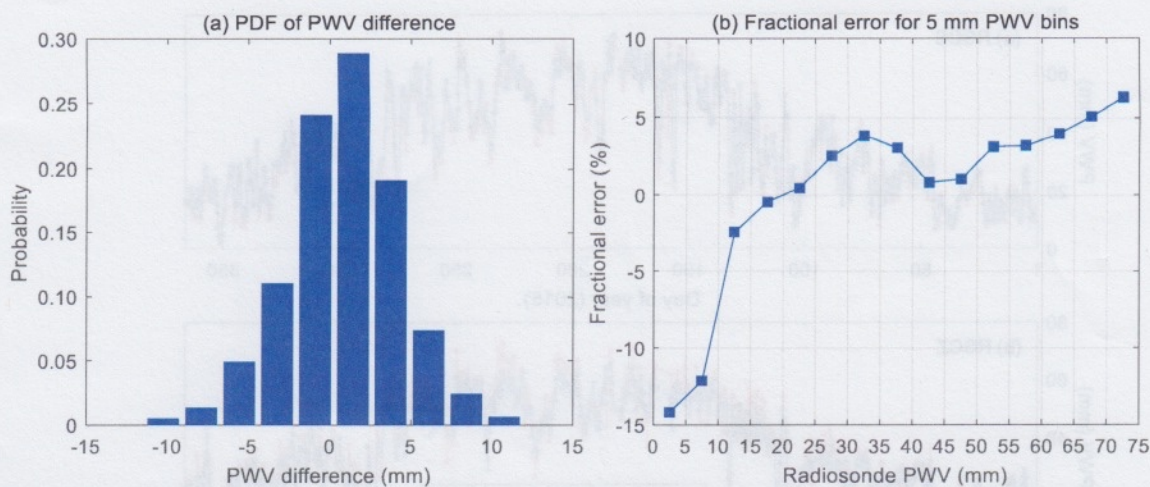

Figure 5: (a) PDF of PWV difference and (b) fractional error as percent by radiosonde 5 mm PWV bins. All the three radiosonde stations are used in the statistics.

#### 4.3 PWV comparison between ECMWF reanalysis products and GNSS interpolation data

- 5 The ERA-Interim reanalysis products are used to further assess the performance of PWV maps constructed by the GNSS network data. For the comparison, the GNSS PWVs are interpolated onto grid points with a spatial resolution of  $0.25^\circ$  in both latitude and longitude directions to match the ECMWF PWV data. Figure 6 presents the spatial distribution of the bias and RMS error of the PWV differences between ECMWF and GNSS over the Hunan region. As seen in Figure 6(a), the bias varies from -8 mm to 6 mm depending upon the location. In general, mountainous regions have a larger bias than plain regions. In terms of RMS error, as shown in Figure 6(b), its values vary in the range of 2–8 mm. Large parts of the studied region are populated with RMS errors less than 3 mm. However, relatively large RMS errors of more than 6 mm are obtained for some mountainous regions.
- 10 In addition, the PDF of PWV differences the shown in Figure 7(a) indicates that there is a higher probability of negative PWV difference. Negative values account for about 64% of the total PWV difference. The fractional error as percent by ECMWF 5 mm PWV bins varies greatly from about -65% to 10%. When PWV values are smaller than 10 mm, there is an obvious wet bias relative to the ECMWF. The largest negative fractional error occurs at the extremely low (less than 5 mm) PWV values. When PWV values are larger than 60 mm, dry bias relative to ECMWF can be observed for PWV values. Figure 7(c) exhibits the relationship between RMS error and elevation. It is clearly seen that the RMS error increases generally with increase in elevation. A High correlation coefficient of 0.73 is achieved between RMS error and elevation. This is consistent with the bias and RMS error maps in Figure 6. The high correlation coefficient is probably due to reasons: 1) vertical adjustment for PWV according to equation (8) is unable to accurately capture the highly dynamic water vapor variation in the vertical direction; and (2) the performance of the high-resolution ( $0.25^\circ \times 0.25^\circ$ ) ECMWF PWV product degrades with increased elevation.
- 20



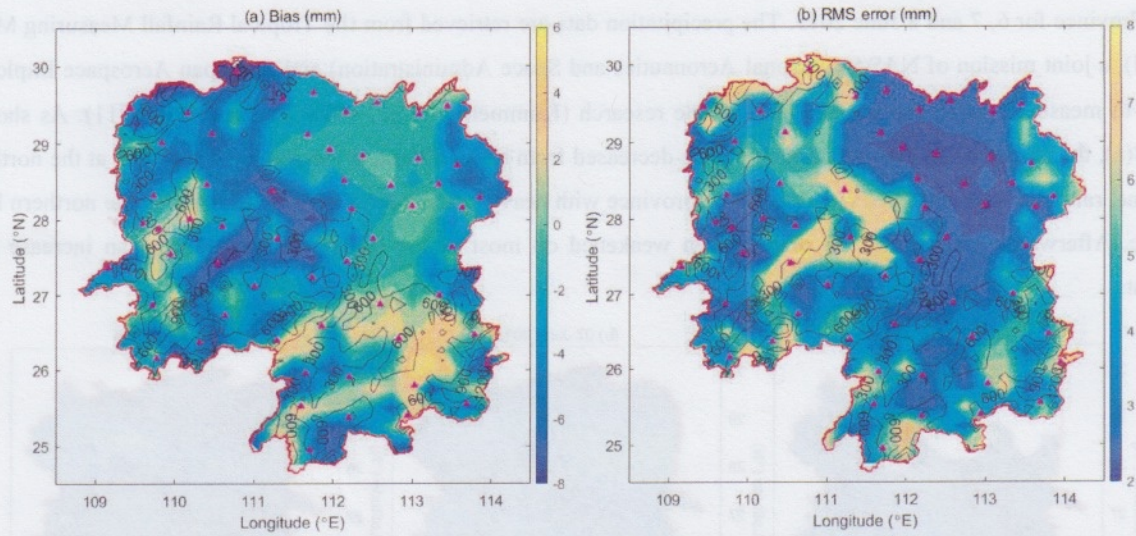

Figure 6: Map of (a) bias and (b) RMS error of the differences between ECMWF PWV and GNSS interpolated PWV over the Hunan Province for the year 2015. Black contours represent the elevation (unit: m).

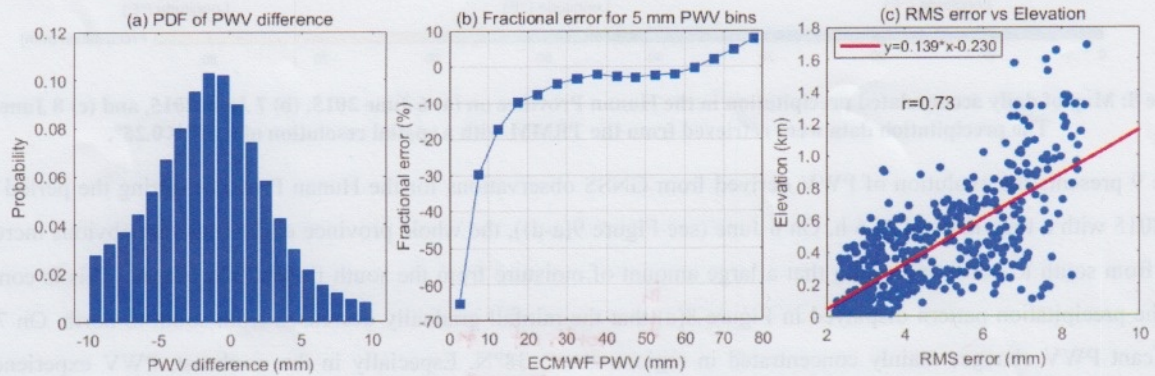

Figure 7: (a) PDF of PWV difference, (b) fractional error as percent by ECMWF 5 mm PWV bins, and (c) relationship between RMS error and elevation for the comparison between ECMWF and GNSS.

#### 4.4 Monitoring water vapor variations using GNSS derived PWV maps

The ultimate goal of this study is to apply the constructed PWV maps for the study of weather forecasting. We further investigated the water vapor variations during a large-scale heavy precipitation event using the PWV maps derived from GNSS observations. In June 2015, Hunan Province suffered several large-scale regional torrential rains, which caused major floods and massive landslides in some places. An average rainfall of 236 mm over the whole province was recorded in that month, and the accumulated rainfall exceeded 500 mm in many areas. In this study, we focused on a heavy rainfall process occurring during 6-8 June 2015. Figure 8 exhibits the geographic distribution of the daily accumulated precipitation over the



Hunan Province for 6, 7 and 8 June 2015. The precipitation data are retrieved from the Tropical Rainfall Measuring Mission (TRMM), a joint mission of NASA (National Aeronautics and Space Administration) and the Japan Aerospace Exploration Agency to measure rainfall for weather and climate research (Kummerow *et al.*, 1998; Lau and Wu, 2011). As shown in Figure 8(a), the accumulated precipitation on 6 June decreased from about 60 mm at the southeast to 0 mm at the northwest.

- 5 On 7 June, rainfalls were observed over the whole province with heavy precipitation mainly occurring in the northern Hunan Province. Afterwards, on 8 June, the precipitation weakened on most of the Hunan province except <sup>for</sup> an increase in the northeast.

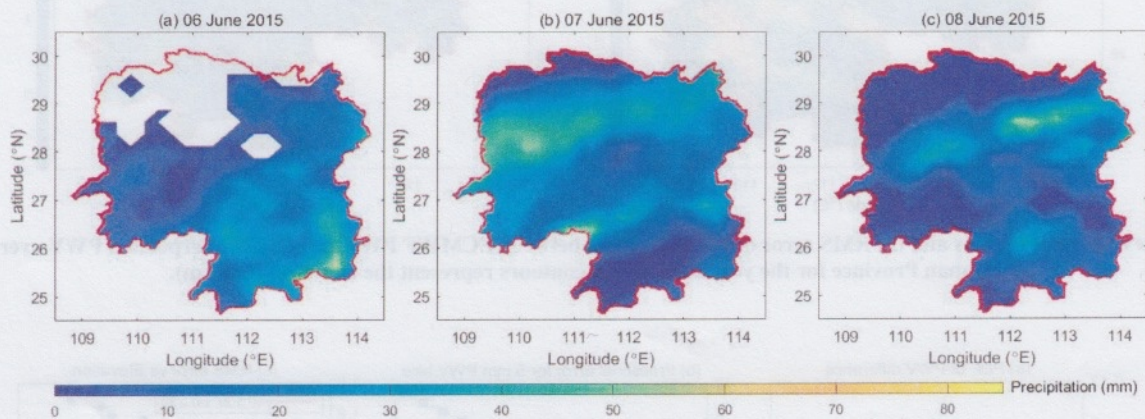

Figure 8: Map of daily accumulated precipitation in the Hunan Province on (a) 6 June 2015, (b) 7 June 2015, and (c) 8 June 2015. The precipitation data were retrieved from the TRMM with a spatial resolution of  $0.25^{\circ} \times 0.25^{\circ}$ .

Figure 9 presents the evolution of PWV derived from GNSS observations for the Hunan Province during the period of 6-8 June 2015 with a time interval of 6 h. On 6 June (see Figure 9(a-d)), the whole province experienced an obvious increase in PWV from south to north, indicating that a large amount of moisture from the south flowed into Hunan. This is consistent with the precipitation pattern displayed in Figure 8(a) that the rainfall gradually decreased from south to north. On 7 June, significant PWV changes mainly concentrated in regions <sup>in</sup> above 38°N. Especially in the northeast, PWV experienced an increase of 10-15 mm from UTC 00 to UTC 12 of 7 June and then dissipated quickly. On 8 June, obvious PWV decreases were observed in the northwest, whereas the southeast experienced a slight increase in PWV. The precipitation maps shown in Figure 8(b) and (c) also agree well with the PWV variations. From 7 June to 8 June, the precipitation areas shrank greatly <sup>largely decreased</sup> in the north whilst slightly expanded in the south. The PWV maps are able to reveal the moisture advection, transportation and convergence during the heavy precipitation event.

\* check  $\rightarrow 28^{\circ}\text{N}$  ?



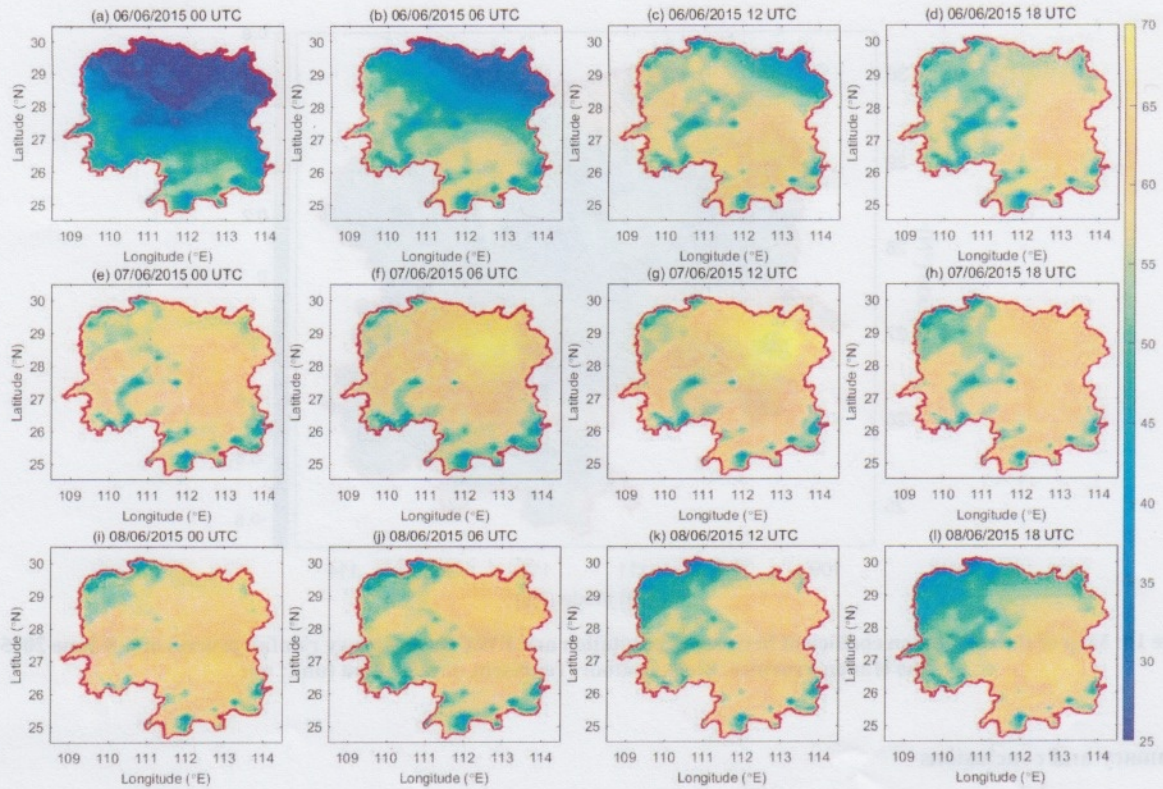

**Figure 9: Evolution of GNSS-derived PWV maps for the Hunan province every 6 h from UTC 00, 6 June 2015 to UTC 18, 8 June 2015.**

In addition, Figure 10 further exhibits the geographic distribution of the correlation coefficient between precipitation and PWV. The correlation coefficients vary greatly from -0.9 to 0.8 depending upon the location. High positive correlation coefficients are present in western regions between 27°N and 27.5°N. Precipitation and PWV shows a high negative relationship in regions between 26°N and 27°N. It can be found that high positive/negative correlation coefficients mainly occur in mountainous regions, especially in hillsides and valleys. This is because the meso-scale orography creates favorable conditions for precipitation formation by generating moisture convergence and the small scale orography plays an important role by triggering convective initiation and enhancement (Labbouz *et al.*, 2013). Therefore, precipitation and PWV correlate more closely in mountainous regions than flat terrains, and mountainous regions are often sensitive areas prone to high frequency of heavy precipitation.



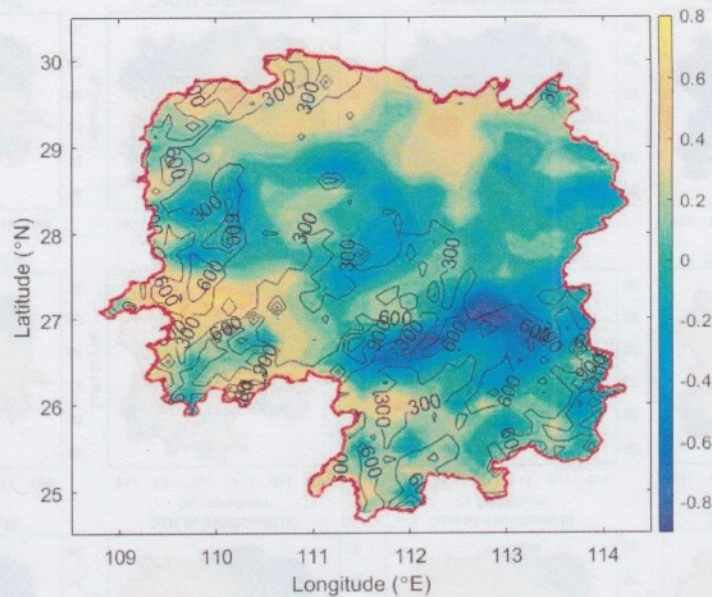

Figure 10: Map of the correlation coefficient between precipitation and PWV for the heavy rainfall process of 6-8 June 2015 over the Hunan Province. Black contours represent the elevation (unit: m).

## 5 Summary and conclusions

- 5 The lack of collocated meteorological data at GNSS station makes it difficult to take full advantage of GNSS observations for weather studies. This paper investigates an alternative method for accurate determination of PWV for near-real-time applications using GNSS data and nearby synoptic observations. Moreover, we present a method to construct PWV maps with the use of GNSS network, which is critical for improving the forecasting capability of extreme weathers, e.g. heavy rainfall.
- 10 The proposed approach for PWV map construction consists of two main steps: 1) the  $P_s$  and  $T_m$  derived at the nearby synoptic sites are interpolated onto the location of the GNSS stations through both vertical and horizontal adjustments; and 2) vertical reduction and horizontal interpolation are performed to construct PWV map using the retrieved GNSS PWV. In this study, ECMWF reanalysis data over the whole year of 2014 were employed to estimate all the parameters involved in the above two steps. The accuracies of the synoptic interpolated and GPT2w derived  $P_s$  and  $T_m$  have been evaluated by
- 15 comparing them against the observed values at 3 radiosonde sites in 2015. RMS errors of  $P_s$  and  $T_m$  derived from GPT2w model vary in the range of 4.7-5.6 hPa and 3.8-4.2 K, respectively. The RMS errors from synoptic interpolation are 1.7-3.0 hPa and 2.5-3.0 K, respectively, which are much better than the GPT2w model.
- In addition, GNSS interpolated PWVs are assessed with respect to reference PWV values from radiosonde and ECMWF reanalysis. GNSS interpolated PWVs show a good agreement with the radiosonde measured ones with RMS errors varying
- 20 in the range of 2.4-3.0 mm. In the comparison with ECMWF, the biases of their differences vary from -8 mm to 6 mm over



the Hunan Province and mountainous regions have a larger bias than flat regions in general. RMS errors are within the range of 2–8 mm with <sup>those for being</sup> most regions <sup>I</sup> less than 3 mm. For PWV values less than 10 mm or more than 60 mm, there is an obvious wet or dry bias relative to ~~the~~ <sup>I</sup> ECMWF. Furthermore, the RMS errors are found to increase with increased elevation in general and a high correlation coefficient of 0.73 is obtained between RMS error and elevation.

5 We further apply the constructed PWV maps to monitor the water vapor variability during a large-scale heavy precipitation event that occurred during 6–8 June 2015 in the Hunan Province. Results demonstrate that it is possible to reveal the moisture advection, transportation and convergence during the heavy rainfall using PWV maps. Since the orography provides favorable conditions for precipitation formation, we also find that the precipitation and PWV correlate more closely in mountainous regions, especially in hillsides and valleys.

10 This research demonstrates the potentials of retrieving accurate PWV from GNSS observations using adjacent synoptic data and generating high-quality PWV maps from <sup>the</sup> GNSS network for weather prediction in near-real-time. Future work will focus on the three following issues: (1) examining the reliability of the PWV map construction in other areas with highly dynamic water vapor; (2) assessing the performance <sup>of</sup> the constructed PWV maps with higher spatial and temporal resolutions; and (3) assimilating the PWV maps into <sup>a</sup> numerical prediction model to enhance the capability of extreme weather forecasting.

15 *Data availability.* The ECMWF ERA-Interim reanalysis products are available online (<http://apps.ecmwf.int/datasets/>). The radiosonde data were obtained from <http://weather.uwyo.edu/upperair/sounding.html>. The TRMM rainfall data were provided by <https://pmm.nasa.gov/data-access/downloads/trmm>. The synoptic observations were provided by <http://rda.ucar.edu/datasets/ds336.0/>. The SRTM30 PLUS data were provided by <http://topex.ucsd.edu/index.html>. The  
20 radiosonde data of Hong Kong were obtained from <http://weather.uwyo.edu/upperair/sounding.html>. The GNSS observations of the Hunan GNSS network presented in this study are available from the authors upon request ([yeary124@csu.edu.cn](mailto:yeary124@csu.edu.cn)).

*Competing interests.* The authors declare that they have no conflict of interest.

25 *Acknowledgments.* Zhizhao Liu thanks the Hong Kong Polytechnic University (projects 152149/16E, 152103/14E, 152168/15E, and 1-BBYH) and the grant supports from the Key Program of the National Natural Science Foundation of China (project No.: 41730109). The European Centre for Medium-Range Weather Forecasts is appreciated for providing the ECMWF reanalysis data. The TRMM rainfall data were provided by the National Aeronautics and Space Administration  
30 (NASA), via <https://pmm.nasa.gov/data-access/downloads/trmm>. The synoptic observations were provided by the National Center for Atmospheric Research (NCAR), from the website <http://rda.ucar.edu/datasets/ds336.0/>. The SRTM30 PLUS data were provided by the Satellite Geodesy research group at the Cecil H. and Ida M. Institute of Geophysics and Planetary Physics, Scripps Institution of Oceanography, University of California San Diego, from the website



<http://topex.ucsd.edu/index.html>. Finally, the authors want to thank the University of Wyoming for providing the radiosonde data.

## References

- Ahrens, C. and Samson, P.: Extreme weather and climate, 1 edition (Feb. 22 2010)., Brooks Cole, United States of America., 2011.
- Alshawaf, F., Fuhrmann, T., Knopfler, A., Luo, X., Mayer, M., Hinz, S. and Heck, B.: Accurate Estimation of Atmospheric Water Vapor Using GNSS Observations and Surface Meteorological Data, *IEEE Trans. Geosci. Remote Sens.*, 53(7), 3764–3771, doi:10.1109/TGRS.2014.2382713, 2015.
- Askne, J. and Nordius, H.: Estimation of tropospheric delay for microwaves from surface weather data, *Radio Sci.*, 22(3), 379–386, 1987.
- Becker, J. J., Sandwell, D. T., Smith, W. H. F., Braud, J., Binder, B., Depner, J., Fabre, D., Factor, J., Ingalls, S., Kim, S.-H., Ladner, R., Marks, K., Nelson, S., Pharaoh, A., Trimmer, R., Von Rosenberg, J., Wallace, G. and Weatherall, P.: Global Bathymetry and Elevation Data at 30 Arc Seconds Resolution: SRTM30\_PLUS, *Mar. Geod.*, 32(4), 355–371, doi:10.1080/01490410903297766, 2009.
- Bevis, M., Businger, S., Herring, T. A., Rocken, C., Anthes, R. A. and Ware, R. H.: GPS meteorology: Remote sensing of atmospheric water vapor using the Global Positioning System, *J. Geophys. Res. Atmospheres* 1984–2012, 97(D14), 15787–15801, 1992.
- Bevis, M., Businger, S., Chiswell, S., Herring, T., Anthes, R., Rocken, C. and Ware, R. H.: GPS Meteorology: Mapping zenith wet delays onto precipitable water, *J. Appl. Meteorol.*, 33, 379–386, 1994.
- Boehm, J., Heinkelmann, R. and Schuh, H.: Short Note: A global model of pressure and temperature for geodetic applications, *J. Geod.*, 81(10), 679–683, doi:10.1007/s00190-007-0135-3, 2007.
- Böhm, J., Möller, G., Schindelegger, M., Pain, G. and Weber, R.: Development of an improved empirical model for slant delays in the troposphere (GPT2w), *GPS Solut.*, 19(3), 433–441, doi:10.1007/s10291-014-0403-7, 2015.
- Brenot, H., Neméghaire, J., Delobbe, L., Clerbaux, N., De Meutter, P., Deckmyn, A., Delcloo, A., Frappez, L. and Van Roozendael, M.: Preliminary signs of the initiation of deep convection by GNSS, *Atmospheric Chem. Phys.*, 13(11), 5425–5449, doi:10.5194/acp-13-5425-2013, 2013.
- Chen, B. and Liu, Z.: A Comprehensive Evaluation and Analysis of the Performance of Multiple Tropospheric Models in China Region, *IEEE Trans. Geosci. Remote Sens.*, 54(2), 663–678, doi:10.1109/TGRS.2015.2456099, 2016a.
- Chen, B. and Liu, Z.: Global Water Vapor Variability and Trend from the Latest 36-Year (1979 to 2014) Data of ECMWF and NCEP Reanalyses, Radiosonde, GPS and Microwave Satellite, *J. Geophys. Res. Atmospheres*, 121(19), 11442–11462, doi:10.1002/2016JD024917, 2016b.



- Davis, J. L., Herring, T. A., Shapiro, I. I., Rogers, A. E. E. and Elgered, G.: Geodesy by radio interferometry: Effects of atmospheric modeling errors on estimates of baseline length, *Radio Sci.*, 20(6), 1593–1607, 1985.
- Dee, D. P., Uppala, S. M., Simmons, A. J., Berrisford, P., Poli, P., Kobayashi, S., Andrae, U., Balmaseda, M. A., Balsamo, G., Bauer, P., Bechtold, P., Beljaars, A. C. M., van de Berg, L., Bidlot, J., Bormann, N., Delsol, C., Dragani, R., Fuentes, M., Geer, A. J., Haimberger, L., Healy, S. B., Hersbach, H., Hólm, E. V., Isaksen, I., Kållberg, P., Köhler, M., Matricardi, M., McNally, A. P., Monge-Sanz, B. M., Morcrette, J.-J., Park, B.-K., Peubey, C., de Rosnay, P., Tavolato, C., Thépaut, J.-N. and Vitart, F.: The ERA-Interim reanalysis: configuration and performance of the data assimilation system, *Q. J. R. Meteorol. Soc.*, 137, 553–597, doi:10.1002/qj.828, 2011.
- Dousa, J. and Elias, M.: An improved model for calculating tropospheric wet delay, *Geophys. Res. Lett.*, 41(12), 4389–4397, doi:10.1002/2014GL060271, 2014.
- Kummerow, C., Barnes, W., Kozu, T., Shiue, J. and Simpson, J.: The tropical rainfall measuring mission (TRMM) sensor package, *J. Atmospheric Ocean. Technol.*, 15(3), 809–817, 1998.
- Labbouz, L., Van Baelen, J., Tridon, F., Reverdy, M., Hagen, M., Bender, M., Dick, G., Gorgas, T. and Planche, C.: Precipitation on the lee side of the Vosges Mountains: Multi-instrumental study of one case from the COPS campaign, *Meteorol. Z.*, 22(4), 413–432, doi:10.1127/0941-2948/2013/0413, 2013.
- Lagler, K., Schindelegger, M., Böhm, J., Krásná, H. and Nilsson, T.: GPT2: Empirical slant delay model for radio space geodetic techniques, *Geophys. Res. Lett.*, 40(6), 1069–1073, doi:10.1002/grl.50288, 2013.
- Lau, K.-M. and Wu, H.-T.: Climatology and changes in tropical oceanic rainfall characteristics inferred from Tropical Rainfall Measuring Mission (TRMM) data (1998–2009), *J. Geophys. Res.*, 116(D17), doi:10.1029/2011JD015827, 2011.
- Lu, C., Li, X., Li, Z., Heinkelmann, R., Nilsson, T., Dick, G., Ge, M. and Schuh, H.: GNSS tropospheric gradients with high temporal resolution and their effect on precise positioning, *J. Geophys. Res. Atmospheres*, 121(2), 912–930, doi:10.1002/2015JD024255, 2016.
- Lu, N., Qin, J., Gao, Y., Yang, K., Trenberth, K. E., Gehne, M. and Zhu, Y.: Trends and variability in atmospheric precipitable water over the Tibetan Plateau for 2000–2010, *Int. J. Climatol.*, 35(7), 1394–1404, doi:10.1002/joc.4064, 2015.
- Mohanakumar, K.: *Stratosphere troposphere interactions: An introduction*, Springer, New York, USA., 2008.
- Musa, T. A., Amir, S., Othman, R., Ses, S., Omar, K., Abdullah, K., Lim, S. and Rizos, C.: GPS meteorology in a low-latitude region: Remote sensing of atmospheric water vapor over the Malaysian Peninsula, *J. Atmospheric Sol.-Terr. Phys.*, 73(16), 2410–2422, doi:10.1016/j.jastp.2011.08.014, 2011.
- Saastamoinen, J.: Atmospheric correction for the troposphere and stratosphere in radio ranging of satellites, *Geophys. Monogr. Ser.*, 15, 247–251, 1972.
- Van Baelen, J., Reverdy, M., Tridon, F., Labbouz, L., Dick, G., Bender, M. and Hagen, M.: On the relationship between water vapour field evolution and the life cycle of precipitation systems, *Q. J. R. Meteorol. Soc.*, 137(S1), 204–223, doi:10.1002/qj.785, 2011.



- Wang, J., Zhang, L., Dai, A., Van Hove, T. and Van Baelen, J.: A near-global, 2-hourly data set of atmospheric precipitable water from ground-based GPS measurements, *J. Geophys. Res.*, 112(D11), doi:10.1029/2006JD007529, 2007.
- Wang, X., Zhang, K., Wu, S., He, C., Cheng, Y. and Li, X.: Determination of zenith hydrostatic delay and its impact on GNSS-derived integrated water vapor, *Atmospheric Meas. Tech.*, 10(8), 2807–2820, doi:10.5194/amt-10-2807-2017, 2017.
- 5 Yao, Y., Shan, L. and Zhao, Q.: Establishing a method of short-term rainfall forecasting based on GNSS-derived PWV and its application, *Sci. Rep.*, 7(1), doi:10.1038/s41598-017-12593-z, 2017.
- Yao, Y. B., Zhang, B., Yue, S. Q., Xu, C. Q. and Peng, W. F.: Global empirical model for mapping zenith wet delays onto precipitable water, *J. Geod.*, 87(5), 439–448, doi:10.1007/s00190-013-0617-4, 2013.
- Yuan, Y., Zhang, K., Rohm, W., Choy, S., Norman, R. and Wang, C.-S.: Real-time retrieval of precipitable water vapor from  
10 GPS precise point positioning, *J. Geophys. Res. Atmospheres*, 119(16), 10044–10057, doi:10.1002/2014JD021486, 2014.
- Zhang, H., Yuan, Y., Li, W., Ou, J., Li, Y. and Zhang, B.: GPS PPP-derived precipitable water vapor retrieval based on Tm/Ps from multiple sources of meteorological data sets in China, *J. Geophys. Res. Atmospheres*, doi:10.1002/2016JD026000, 2017.
- Zhang, K., Manning, T., Wu, S., Rohm, W., Silcock, D. and Choy, S.: Capturing the signature of severe weather events in  
15 Australia using GPS measurements, *IEEE J. Sel. Top. Appl. Earth Obs. Remote Sens.*, 8(4), 1839–1847, doi:10.1109/JSTARS.2015.2406313, 2015.
